# Supplementary material for: Determination of fitness traits of Orius strigicollis Poppius (Hemiptera: Anthocoridae) on Pectinophora gossypiella (Lepidoptera: Gelechiidae) using two-sex life table analysis
Source: PeerJ. 2020 Aug 17;8:e9594. doi: 10.7717/peerj.9594 (PMC7439961; doi:10.7717/peerj.9594)
Supplement: Supplemental Information 2 [file peerj-08-9594-s002.xlsx]

## Sheet: PBW eggs FP 24 h
		Total instars used= 3rd, 4th, 5th, male and female
		Temperature= 24, 28 and 32 °C
		PBW Eggs frequency as Prey= 20
		Duration= 24 hours
	24,28 and 32 °C						24, 28 and 32 °C						24,28 and 32 °C						24,28 and 32 °C						24,28 and 32 °C
	Number of eggs eat in time lap (24 h)						Number of eggs eat in time lap (24 h)						Number of eggs eat in time lap (24 h)						Number of eggs eat in time lap (24 h)						Number of eggs eat in time lap (24 h)
	3rd Instar						4th Instar						5th Instar						Male						Female
	Replicates	24 C	28 C	32 C			Replicates	24 C	28 C	32 C			Replicates	24 C	28 C	32 C			Replicates	24 C	28 C	32 C			Replicates	24 C	28 C	32 C
	1	15	10	8			1	6	8	6			1	5	12	12			1	10	12	9			1	9	8	9
	2	1	4	5			2	5	5	5			2	10	6	8			2	8	11	10			2	7	9	9
	3	5	10	5			3	8	10	3			3	4	9	10			3	6	9	12			3	9	10	8
	4	1	11	3			4	10	10	8			4	8	11	8			4	8	10	8			4	10	9	7
	5	12	10	9			5	9	12	6			5	11	8	7			5	10	10	9			5	6	10	10
	6	5	7	10			6	6	9	10			6	8	6	5			6	7	7	4			6	11	11	9
	7	5	7	5			7	7	7	12			7	8	8	9			7	9	8	10			7	9	9	7
	8	13	9	8			8	8	4	9			8	3	12	10			8	9	9	9			8	10	12	9
	9	1	6	6			9	5	6	10			9	6	8	10			9	8	12	8			9	7	9	8
	10	7	7	12			10	5	12	7			10	5	11	7			10	6	8	10			10	8	8	7
	11	10	8	6			11	9	5	12			11	3	10	12			11	10	7	7			11	11	11	8
	12	2	15	9			12	2	8	6			12	9	9	7			12	9	11	11			12	5	8	7
	13	8	7	10			13	3	6	10			13	6	8	12			13	5	8	10			13	10	13	10
	14	2	8	9			14	4	5	4			14	9	5	7			14	8	10	9			14	9	8	8
	15	3	6	7			15	8	6	9			15	8	13	10			15	9	8	5			15	5	9	7
	16	5	2	10			16	12	9	12			16	7	10	9			16	6	9	10			16	10	12	9
	17	15	5	11			17	10	8	8			17	5	9	5			17	10	10	9			17	8	9	10
	18	3	7	3			18	1	7	7			18	10	8	8			18	9	9	8			18	10	10	12
	19	4	7	5			19	7	13	10			19	4	13	10			19	6	10	10			19	9	8	8
	20	4	13	7			20	9	10	5			20	6	8	9			20	9	8	10			20	6	12	9
	21	5	8	8			21	7	8	9			21	11	12	7			21	10	12	9			21	8	9	8
	22	4	7	5			22	3	6	7			22	10	9	6			22	8	9	8			22	7	11	10
	23	8	5	5			23	8	10	6			23	5	10	10			23	7	12	8			23	9	9	9
	24	3	13	7			24	8	15	9			24	9	7	8			24	9	9	9			24	8	8	8
	25	6	10	3			25	4	7	4			25	5	6	7			25	5	11	10			25	6	11	10
	26	10	9	5			26	6	5	7			26	8	8	10			26	7	9	5			26	7	9	7
	27	3	7	2			27	13	12	12			27	10	9	6			27	10	10	9			27	3	11	11
	28	2	9	13			28	5	9	6			28	9	5	9			28	5	11	10			28	6	10	10
	29	4	5	10			29	2	8	4			29	5	10	5			29	9	9	9			29	9	9	10
	30	2	9	9			30	6	10	10			30	7	11	9			30	6	12	9			30	10	12	8

## Sheet: PBW L1 12 h
		Total instars used= 3rd, 4th, 5th and adult
		Temperature= 24, 28 and 32 °C
		Larvae frequency as Prey= 20
		Duration=12 hours
		24, 28 and 32 °C					24, 28 and 32 °C						24, 28 and 32 °C						24, 28 and 32 °C					24, 28 and 32 °C					24, 28 and 32 °C
		Number of 1st instar larvae eat in time lap (12 h)					Number of 1st instar larvae eat in time lap (12 h)						Number of 1st instar larvae eat in time lap (12 h)						Number of 1st instar larvae eat in time lap (12 h)					Number of 1st instar larvae eat in time lap (12 h)					Number of 1st instar larvae eat in time lap (12 h)
		3rd Instar					4th Instar						5th Instar						Male					Female					Control
	12 h	Replicates	24 C	28 C	32 C		Replicates	24 C	28 C	32 C			Replicates	24 C	28 C	32 C			Replicates	24 C	28 C	32 C		Replicates	24 C	28 C	32 C		Replicates	24 C	28 C	32 C
		1	3	6	6		1	5	8	7			1	6	8	7			1	10	12	10		1	7	10	9		1	0	3	7
		2	4	7	6		2	3	9	5			2	4	8	9			2	7	10	8		2	5	7	9		2	3	4	7
		3	3	9	2		3	4	7	6			3	8	9	8			3	5	11	10		3	10	10	11		3	4	4	4
		4	5	5	5		4	4	6	5			4	6	6	6			4	10	12	10		4	8	12	9		4	3	3	5
		5	2	4	3		5	7	8	6			5	0	7	7			5	7	10	12		5	6	9	10		5	3	0	3
		6	3	6	5		6	5	5	2			6	4	5	3			6	8	11	10		6	6	12	9		6	6	4	7
		7	5	8	8		7	7	9	8			7	7	6	9			7	8	10	11		7	8	10	12		7	0	5	7
		8	3	7	6		8	2	7	6			8	6	9	6			8	7	11	10		8	4	9	11		8	3	6	5
		9	4	6	7		9	4	4	5			9	5	8	8			9	7	9	9		9	9	12	9		9	2	4	4
		10	2	8	5		10	7	8	7			10	4	4	9			10	10	12	10		10	10	8	11		10	5	6	6
		11	1	5	2		11	5	6	4			11	8	9	7			11	8	11	9		11	7	11	9		11	4	3	4
		12	3	6	7		12	3	9	5			12	6	4	6			12	6	10	11		12	9	12	11		12	0	4	6
		13	3	8	5		13	4	7	8			13	7	8	8			13	5	9	9		13	11	8	9		13	4	5	3
		14	0	5	4		14	6	6	3			14	4	6	3			14	9	12	9		14	8	12	11		14	2	5	3
		15	3	6	7		15	2	9	5			15	5	6	9			15	9	8	10		15	9	10	8		15	4	2	2
		16	4	9	5		16	4	7	7			16	7	7	6			16	6	10	9		16	7	11	9		16	4	4	3
		17	3	5	4		17	7	6	7			17	0	6	7			17	8	8	9		17	8	9	10		17	3	3	7
		18	3	8	3		18	5	5	2			18	6	5	3			18	7	10	9		18	11	11	9		18	4	4	3
		19	4	3	6		19	2	9	8			19	5	7	6			19	10	12	11		19	8	12	12		19	2	3	4
		20	3	9	4		20	3	6	6			20	6	8	7			20	7	11	10		20	9	9	11		20	4	4	8
		21	4	6	7		21	5	6	5			21	8	8	4			21	9	10	9		21	9	12	10		21	3	3	7
		22	2	5	4		22	6	7	4			22	6	6	9			22	6	10	10		22	10	11	11		22	5	0	7
		23	4	4	6		23	6	6	6			23	4	9	3			23	5	8	10		23	8	9	5		23	2	3	4
		24	3	8	7		24	4	9	8			24	7	4	7			24	9	12	10		24	7	10	11		24	0	4	5
		25	5	6	4		25	5	7	5			25	6	8	8			25	7	10	8		25	9	9	10		25	4	6	3
		26	0	9	7		26	5	6	8			26	0	7	3			26	9	10	9		26	9	10	7		26	3	4	5
		27	4	6	6		27	2	8	2			27	5	6	6			27	7	12	10		27	10	7	11		27	2	0	6
		28	2	9	3		28	1	6	7			28	6	8	9			28	8	12	10		28	9	9	11		28	2	3	3
		29	4	8	5		29	4	9	3			29	4	7	3			29	4	9	12		29	8	11	9		29	6	0	5
		30	5	8	2		30	3	7	7			30	8	8	8			30	5	11	9		30	9	10	10		30	0	4	4

## Sheet: PBW L1 24 h
		Total instars used= 3rd, 4th, 5th and adult
		Temperature= 24, 28 and 32 °C
		Larvae frequency as Prey= 20
		Duration=24 hours
		24, 28 and 32 °C					24, 28 and 32 °C						24, 28 and 32 °C						24, 28 and 32 °C					24, 28 and 32 °C					24, 28 and 32 °C
		Number of 1st instar larvae eat in time lap (24 h)					Number of 1st instar larvae eat in time lap (24 h)						Number of 1st instar larvae eat in time lap (24 h)						Number of 1st instar larvae eat in time lap (24 h)					Number of 1st instar larvae eat in time lap (24 h)					Number of 1st instar larvae eat in time lap (24 h)
		3rd Instar					4th Instar						5th Instar						Male					Female					Control
	24 h	Replicates	24 C	28 C	32 C		Replicates	24 C	28 C	32 C			Replicates	24 C	28 C	32 C			Replicates	24 C	28 C	32 C		Replicates	24 C	28 C	32 C		Replicates	24 C	28 C	32 C
		1	7	9	5		1	8	10	10			1	9	9	11			1	9	10	12		1	10	12	11		1	5	5	4
		2	3	7	6		2	6	9	9			2	6	8	8			2	10	11	10		2	9	11	12		2	3	4	8
		3	8	4	7		3	6	6	6			3	4	10	9			3	8	10	12		3	12	12	12		3	2	4	7
		4	7	8	8		4	9	7	9			4	7	9	7			4	12	11	12		4	11	12	12		4	5	5	5
		5	4	7	5		5	7	8	11			5	6	9	10			5	10	12	10		5	10	9	10		5	4	6	4
		6	8	8	7		6	7	5	9			6	8	10	12			6	9	12	12		6	10	12	10		6	3	4	3
		7	6	10	9		7	5	9	8			7	9	8	10			7	10	12	12		7	11	8	12		7	6	2	8
		8	5	9	10		8	4	7	7			8	10	8	9			8	11	11	11		8	10	12	12		8	3	3	7
		9	7	6	7		9	9	10	9			9	8	9	7			9	10	11	11		9	11	12	11		9	2	5	6
		10	2	7	8		10	8	6	8			10	7	7	11			10	8	12	10		10	9	11	12		10	4	2	7
		11	3	9	4		11	6	12	9			11	5	10	8			11	9	11	12		11	10	12	12		11	5	2	3
		12	3	8	9		12	5	9	6			12	9	9	6			12	12	12	12		12	9	9	10		12	3	3	4
		13	5	9	6		13	3	9	6			13	4	9	12			13	11	12	10		13	12	12	12		13	6	7	4
		14	2	7	5		14	4	8	7			14	6	7	9			14	9	10	10		14	9	9	11		14	6	4	6
		15	6	7	8		15	7	11	8			15	8	6	10			15	10	12	12		15	9	11	11		15	4	3	7
		16	3	9	5		16	8	9	5			16	7	10	11			16	12	11	10		16	11	12	12		16	4	6	2
		17	5	6	6		17	5	8	5			17	10	7	7			17	10	12	11		17	5	12	12		17	3	2	5
		18	7	10	5		18	5	6	9			18	8	8	9			18	9	10	12		18	11	12	12		18	2	6	8
		19	6	8	8		19	4	10	10			19	6	4	12			19	10	11	10		19	11	13	10		19	6	7	7
		20	5	9	7		20	7	8	4			20	5	8	7			20	8	10	12		20	10	12	12		20	5	4	4
		21	3	8	9		21	8	8	6			21	9	9	6			21	6	12	11		21	10	12	12		21	6	6	7
		22	6	6	5		22	7	7	8			22	10	8	8			22	12	12	11		22	9	12	12		22	4	5	7
		23	8	9	8		23	5	9	9			23	4	10	11			23	9	10	12		23	10	10	12		23	5	4	7
		24	3	6	9		24	2	9	6			24	7	8	9			24	10	11	12		24	9	11	11		24	6	5	6
		25	5	7	7		25	4	8	4			25	8	10	10			25	11	12	11		25	10	12	12		25	3	7	5
		26	2	7	8		26	4	6	5			26	5	8	12			26	9	12	12		26	12	9	12		26	5	6	6
		27	5	10	7		27	7	9	9			27	6	8	7			27	10	11	12		27	11	12	12		27	6	5	8
		28	2	9	4		28	2	10	5			28	6	10	11			28	10	10	12		28	5	11	12		28	3	7	4
		29	4	7	7		29	6	8	8			29	8	9	8			29	6	10	10		29	10	12	12		29	4	7	7
		30	6	8	8		30	8	10	4			30	9	10	12			30	11	12	12		30	11	10	12		30	3	5	7
