# Supplementary material for: Determination of fitness traits of Orius strigicollis Poppius (Hemiptera: Anthocoridae) on Pectinophora gossypiella (Lepidoptera: Gelechiidae) using two-sex life table analysis
Source: PeerJ. 2020 Aug 17;8:e9594. doi: 10.7717/peerj.9594 (PMC7439961; doi:10.7717/peerj.9594)
Supplement: Supplemental Information 3 [file peerj-08-9594-s003.xlsx]

## Sheet: PBW Prey preference 12 h
			Total instars used= 3rd, 4th, 5th, male and female adult
			Temperature= 24, 28 and 32 °C
			PBW Egg and 1st instar Larvae frequency as Prey= 10
			Duration= 12 hours
			24, 28 and 32 °C
			Number of eggs and larvae eat in time lap (12 h)
			3rd Instar								4th Instar								5th Instar								Adult (M)								Adult (F)
			Replicates	24 C (10 eggs)	24 C (10 larvae)	28 C (10 eggs)	28 C (10 larvae)	32 C (10 eggs)	32 C (10 larvae)		Replicates	24 C (10 eggs)	24 C (10 larvae)	28 C (10 eggs)	28 C (10 larvae)	32 C (10 eggs)	32 C (10 larvae)		Replicates	24 C (10 eggs)	24 C (10 larvae)	28 C (10 eggs)	28 C (10 larvae)	32 C (10 eggs)	32 C (10 larvae)		Replicates	24 C (10 eggs)	24 C (10 larvae)	28 C (10 eggs)	28 C (10 larvae)	32 C (10 eggs)	32 C (10 larvae)		Replicates	24 C (10 eggs)	24 C (10 larvae)	28 C (10 eggs)	28 C (10 larvae)	32 C (10 eggs)	32 C (10 larvae)
			1	2	1	3	3	2	2		1	2	2	4	3	2	2		1	2	2	5	5	5	2		1	2	7	7	4	2	8		1	7	3	8	4	6	5
			2	3	0	3	2	3	1		2	4	1	3	4	2	3		2	4	2	5	4	4	2		2	5	4	6	6	7	5		2	5	4	6	6	7	6
			3	1	2	3	3	2	2		3	1	3	4	1	4	1		3	2	3	4	7	2	5		3	2	6	5	6	4	6		3	4	6	3	7	2	8
			4	2	0	4	3	2	2		4	2	4	3	3	3	2		4	3	3	6	3	6	3		4	6	4	6	5	6	5		4	3	6	6	6	3	7
			5	2	2	3	3	2	3		5	2	2	3	3	2	4		5	2	3	4	5	4	2		5	8	2	5	6	5	7		5	7	2	7	4	5	8
			6	2	1	4	2	3	1		6	3	1	2	5	4	1		6	4	1	5	4	4	2		6	7	3	5	6	8	4		6	2	6	6	8	8	5
			7	1	2	3	3	1	3		7	2	2	4	3	2	3		7	2	4	6	4	2	5		7	2	5	6	5	2	7		7	4	7	6	4	4	6
			8	1	1	3	2	2	2		8	1	1	5	3	3	2		8	3	2	4	5	4	3		8	5	4	3	8	5	8		8	6	6	4	8	7	9
			9	2	2	3	3	4	1		9	2	2	4	2	2	3		9	5	1	4	4	3	4		9	2	7	5	7	3	7		9	3	6	8	5	4	8
			10	2	1	3	2	3	2		10	3	1	4	3	5	2		10	3	3	6	4	3	4		10	4	5	7	6	7	5		10	5	6	4	9	8	5

## Sheet: PBW Prey preference 24 h
			Total instars used= 3rd, 4th, 5th, male and female adult
			Temperature= 24, 28 and 32 °C
			PBW Egg and 1st instar Larvae frequency as Prey= 10
			Duration= 24 hours
			24, 28 and 32 °C
			Number of eggs and larvae eat in time lap (24 h)
			3rd Instar									4th Instar									5th Instar								Adult (M)								Adult (F)
			Replicates	24 C (10 eggs)	24 C (10 larvae)	28 C (10 eggs)	28 C (10 larvae)	32 C (10 eggs)	32 C (10 larvae)			Replicates	24 C (10 eggs)	24 C (10 larvae)	28 C (10 eggs)	28 C (10 larvae)	32 C (10 eggs)	32 C (10 larvae)			Replicates	24 C (10 eggs)	24 C (10 larvae)	28 C (10 eggs)	28 C (10 larvae)	32 C (10 eggs)	32 C (10 larvae)		Replicates	24 C (10 eggs)	24 C (10 larvae)	28 C (10 eggs)	28 C (10 larvae)	32 C (10 eggs)	32 C (10 larvae)		Replicates	24 C (10 eggs)	24 C (10 larvae)	28 C (10 eggs)	28 C (10 larvae)	32 C (10 eggs)	32 C (10 larvae)
			1	3	2	4	3	3	1			1	3	2	4	3	4	2			1	4	3	6	4	4	7		1	4	7	6	6	7	6		1	5	7	8	6	5	6
			2	2	2	5	2	2	2			2	4	1	3	4	2	4			2	4	4	4	6	5	3		2	6	5	8	4	5	8		2	6	4	6	8	6	8
			3	1	2	4	2	4	0			3	2	3	5	4	5	2			3	2	3	7	4	4	3		3	5	4	7	5	9	7		3	2	8	7	4	4	9
			4	1	0	5	2	2	3			4	3	2	3	6	4	2			4	5	1	5	7	5	2		4	7	4	6	7	4	4		4	5	6	6	7	5	7
			5	2	2	2	4	2	5			5	5	1	5	2	2	4			5	4	3	6	4	6	3		5	6	6	7	6	6	6		5	8	4	4	8	8	8
			6	5	2	4	2	5	2			6	3	3	6	2	6	1			6	2	4	3	6	4	3		6	8	4	4	8	3	9		6	7	5	6	7	7	4
			7	2	2	5	3	4	3			7	2	4	5	2	3	5			7	3	3	8	3	2	6		7	6	6	7	7	6	7		7	5	7	6	6	7	7
			8	3	2	3	2	2	2			8	3	3	3	4	5	2			8	5	1	5	5	5	4		8	3	8	5	7	8	6		8	6	8	8	9	6	9
			9	1	3	4	3	2	3			9	4	0	2	4	1	4			9	2	3	6	5	7	4		9	5	6	7	8	6	9		9	7	7	7	7	7	7
			10	4	1	2	6	4	2			10	1	3	5	3	4	3			10	2	4	6	6	6	2		10	2	8	7	7	8	7		10	8	5	8	6	8	6
